# Supplementary material for: The intragenus and interspecies quorum-sensing autoinducers exert distinct control over Vibrio cholerae biofilm formation and dispersal
Source: PubMed Central journal article supplement (PMC6872173; doi:10.1371/journal.pbio.3000429), 2019-11-11

# Gel images for Figure 4F

## Anti-FLAG

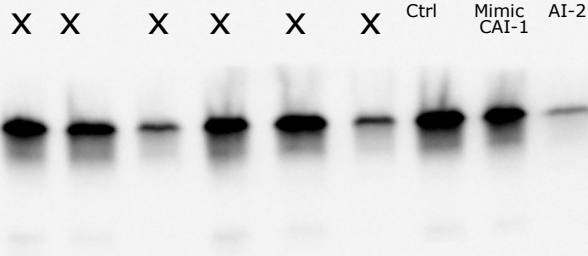

## Anti-RpoA

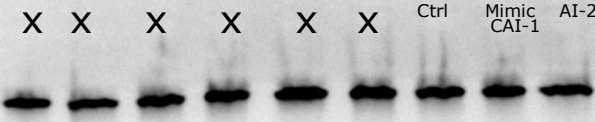

Figure 5E: anti-FLAG western blot

lane 1: OD600=0.05, CqsS<sup>S+R+</sup>

lane 2: OD600=2.0, CqsS<sup>S+R+</sup>

lane 3: OD600=0.05, CqsS<sup>S-R+</sup>

lane 4: OD600=2.0, CqsS<sup>S-R+</sup>

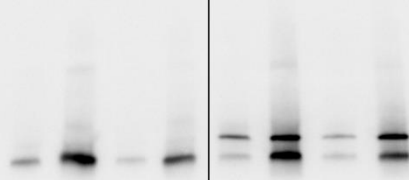

Figure 5B: anti-FLAG western blot

lane 1: OD600=0.05, CqsS<sup>S+R+</sup>LuxPQ<sup>S+R+</sup>

lane 2: OD600=2.0, CqsS<sup>S+R+</sup>LuxPQ<sup>S+R+</sup>

lane 3: OD600=0.05, SWAP

lane 4: OD600=2.0, SWAP



Figure 5E: anti-RpoA loading control

lane 1: OD600=0.05, CAI-1<sup>S+R+</sup>

lane 2: OD600=2.0, CAI-1<sup>S+R+</sup>

lane 3: OD600=0.05, CAI-1<sup>S-R+</sup>

lane 4: OD600=2.0, CAI-1<sup>S-R+</sup>

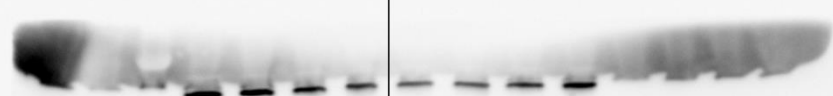

Figure 5B: anti-RpoA loading control

lane 1: OD600=0.05, CAI-1<sup>S+R+</sup>AI-2<sup>S+R+</sup>

lane 2: OD600=2.0, CAI-1<sup>S+R+</sup>AI-2<sup>S+R+</sup>

lane 3: OD600=0.05, SWAP

lane 4: OD600=2.0, SWAP



# Gel images for S6 Fig

## Anti-FLAG

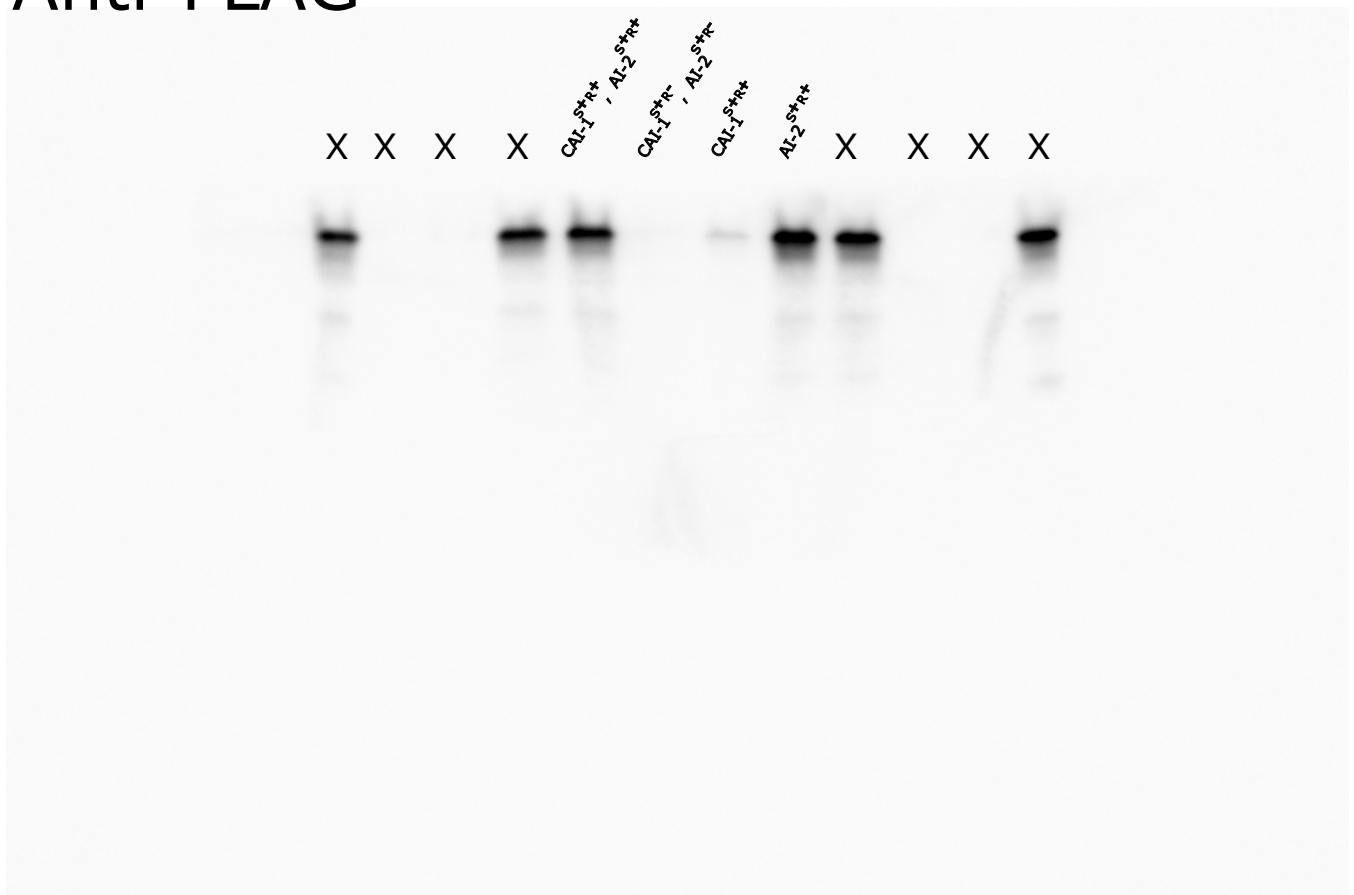

## Anti-RpoA

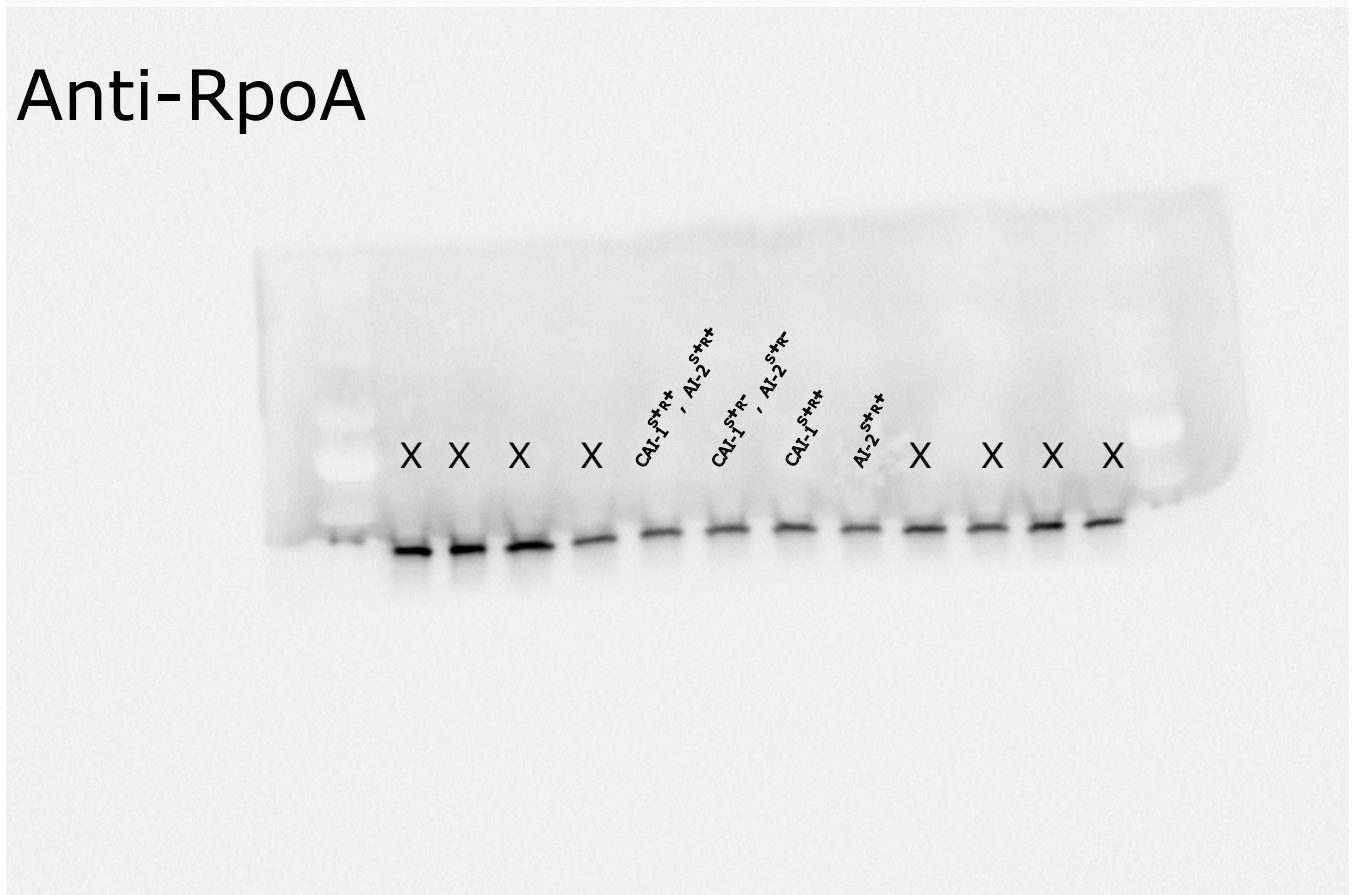

Supplement: pbio.3000429.s013.pdf [file pbio.3000429.s013.pdf]
